# Supplementary material for: On Missingness Features in Machine Learning Models for Critical Care: Observational Study
Source: PubMed Central journal article supplement (PMC8701717; doi:10.2196/25022), 2021-12-08
Supplement: medinform_v9i12e25022_app2.pdf [file medinform_v9i12e25022_app2.pdf]

Multimedia Appendix 2: Further Data and Result Analysis

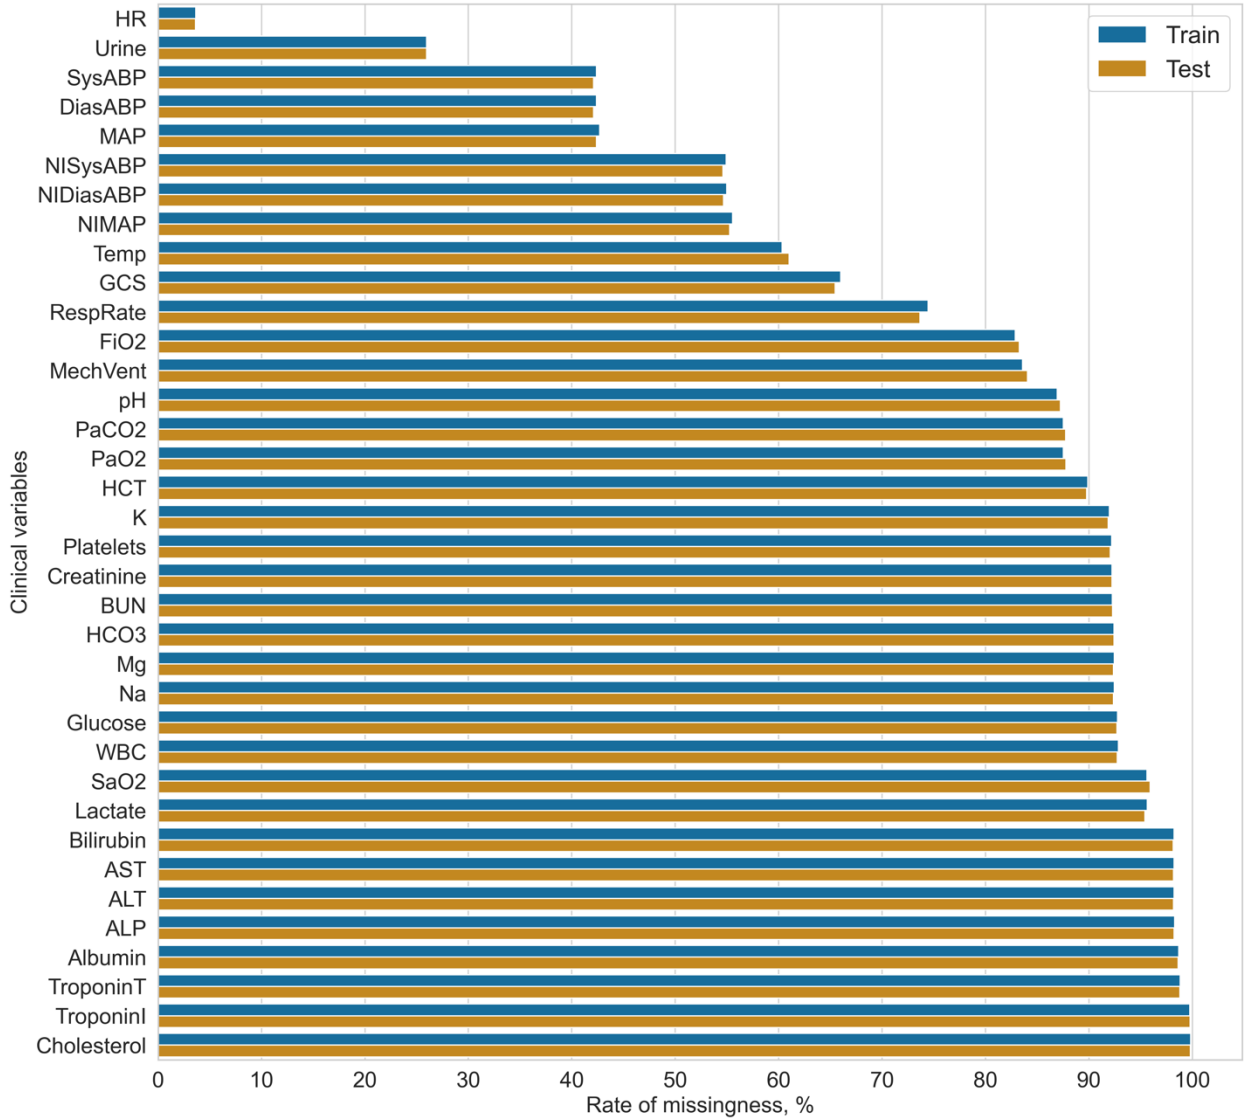

**Figure S1.** All clinical variables with rates of missingness for the P12 training and testing sets. Rate of missingness is the average rate at which a variable is missing across all patients. Since all data in P12 was from the same hospital, missing rates are very similar.

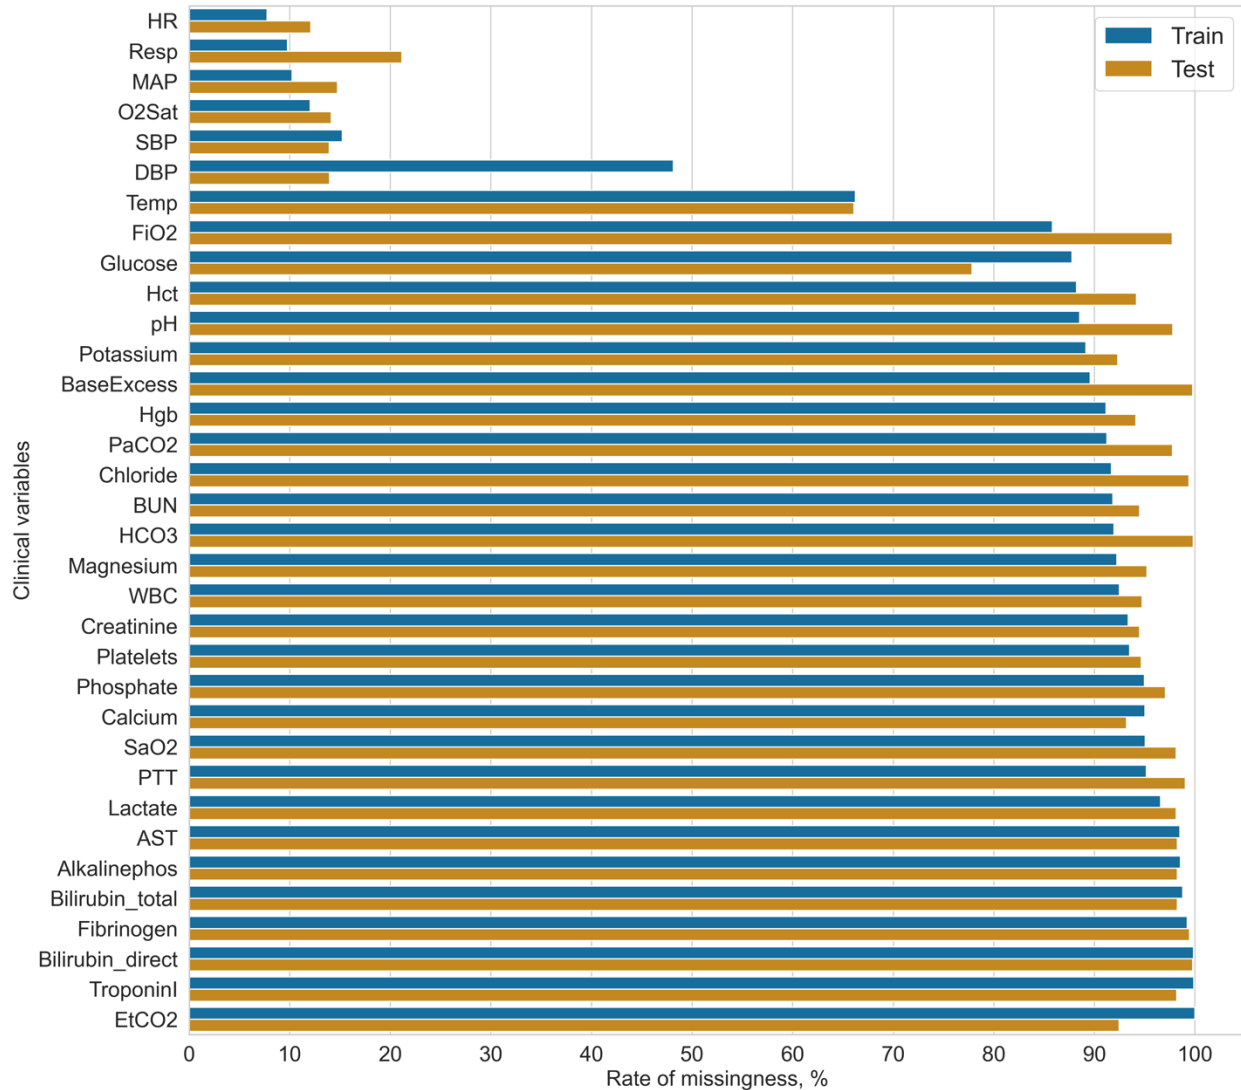

**Figure S2.** All clinical variables with rates of missingness for the **P19** training and testing sets. Rate of missingness is the average rate at which a variable is missing across all patients. Rates of missingness differ since each set is from distinct hospitals.

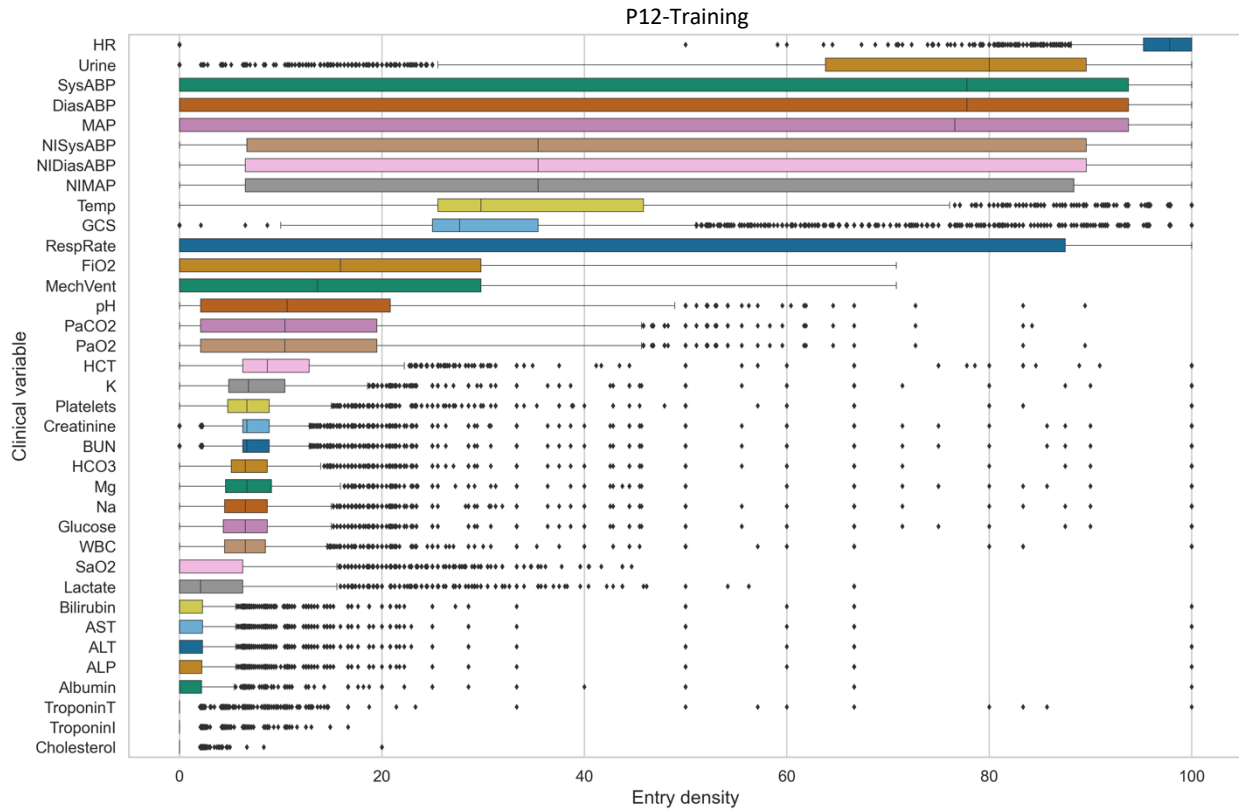

**Figure S3.** Distribution of entry densities (fraction of observations in a patient’s ICU stay) for each variable for the **P12** training set. Entry density is the distribution of the per-patient average observation rate. P12 testing set showed a very similar distribution.

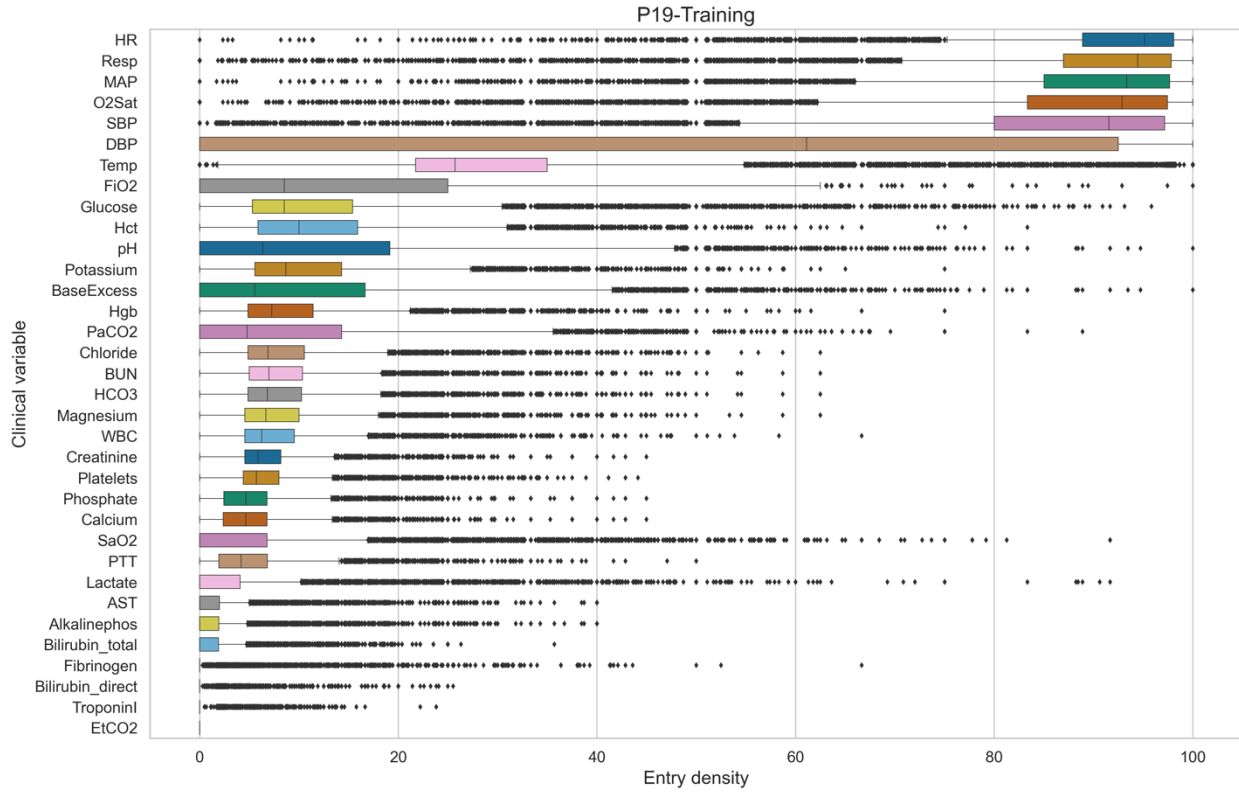

**Figure S4.** Distribution of entry densities (fraction of observations in a patient’s ICU stay) for each variable for the **P19** training set (Hospital A). Entry density is the distribution of the per-patient average observation rate.

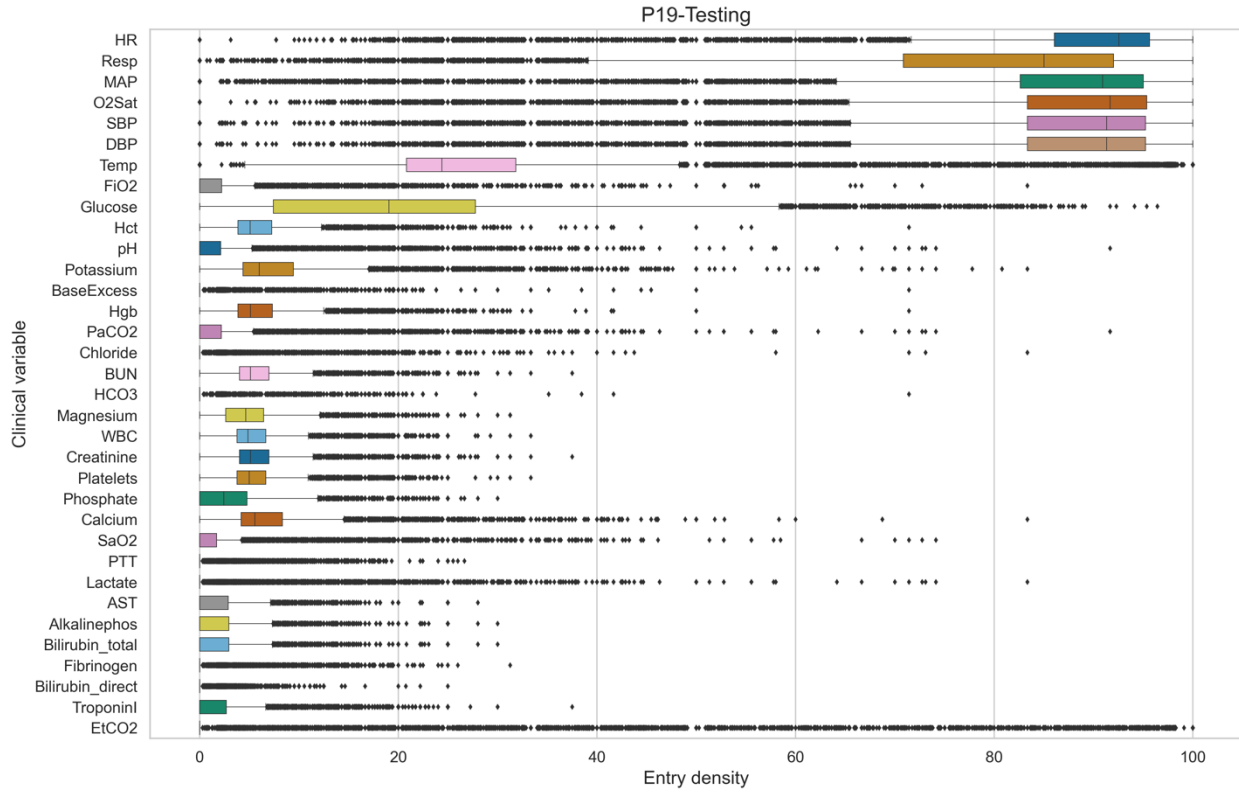

**Figure S5.** Distribution of entry densities (fraction of observations in a patient’s ICU stay) for each variable for the **P19** testing set (Hospital B). Entry density is the distribution of the per-patient average observation rate.

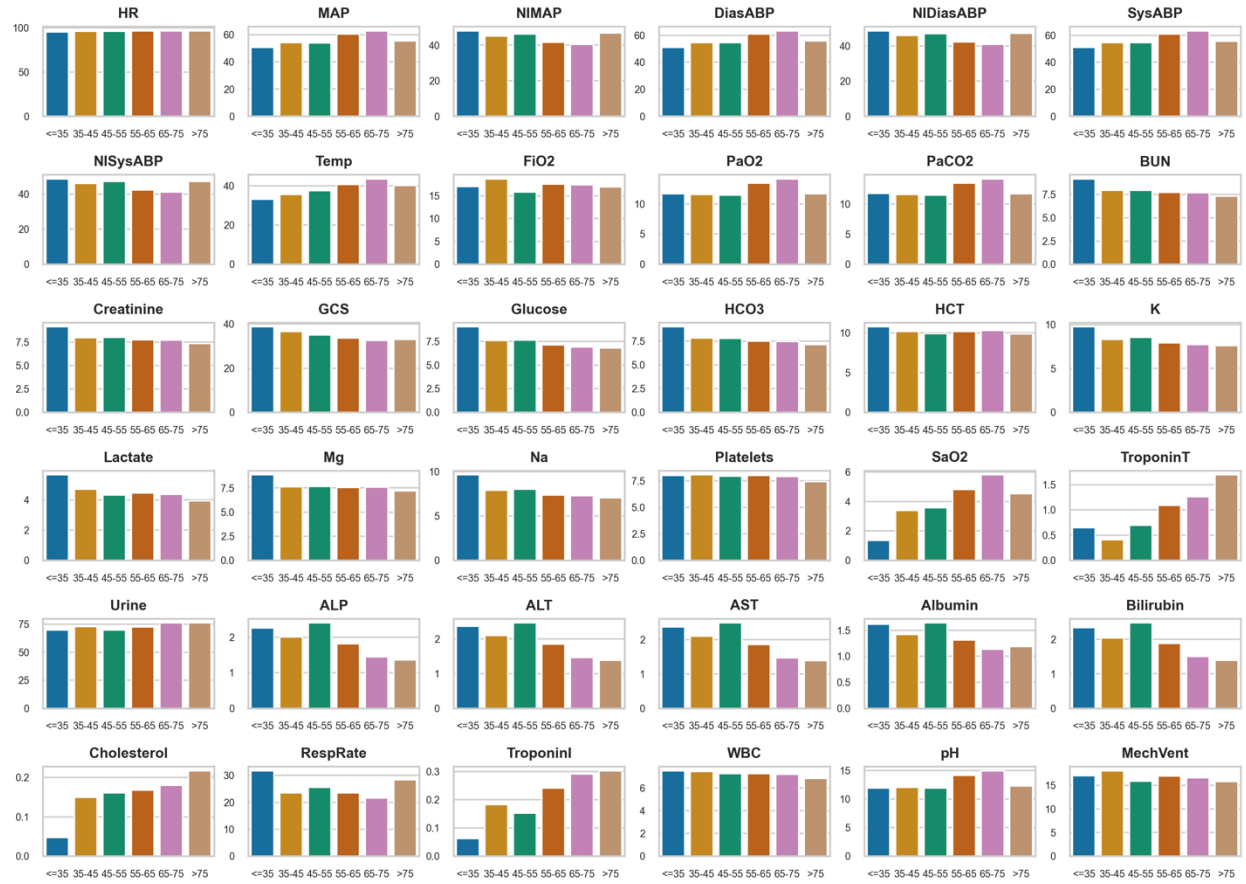

**Figure S6.** Variable observation rates by age group for the **P12** training set.

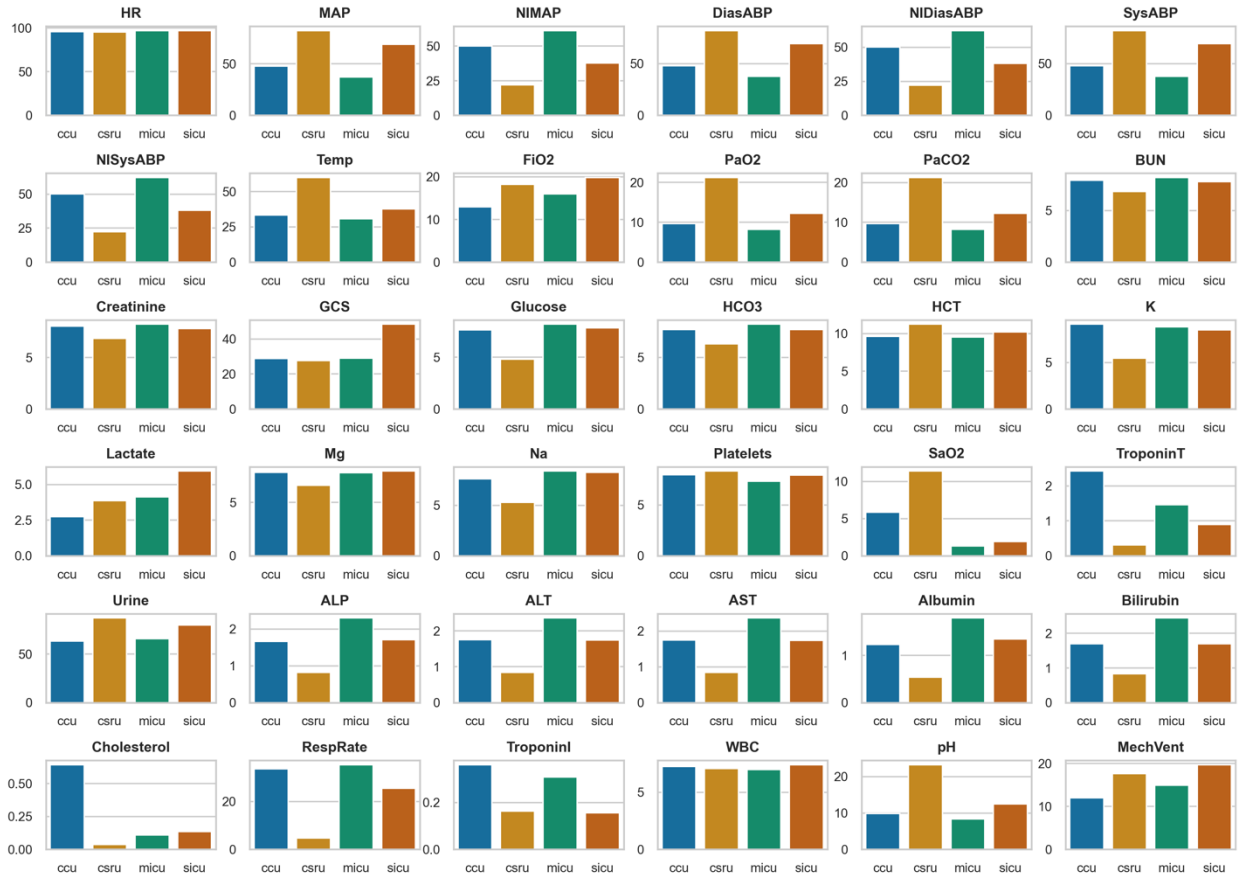

**Figure S7.** Variable observation rates by ICU types for the **P12** training set.

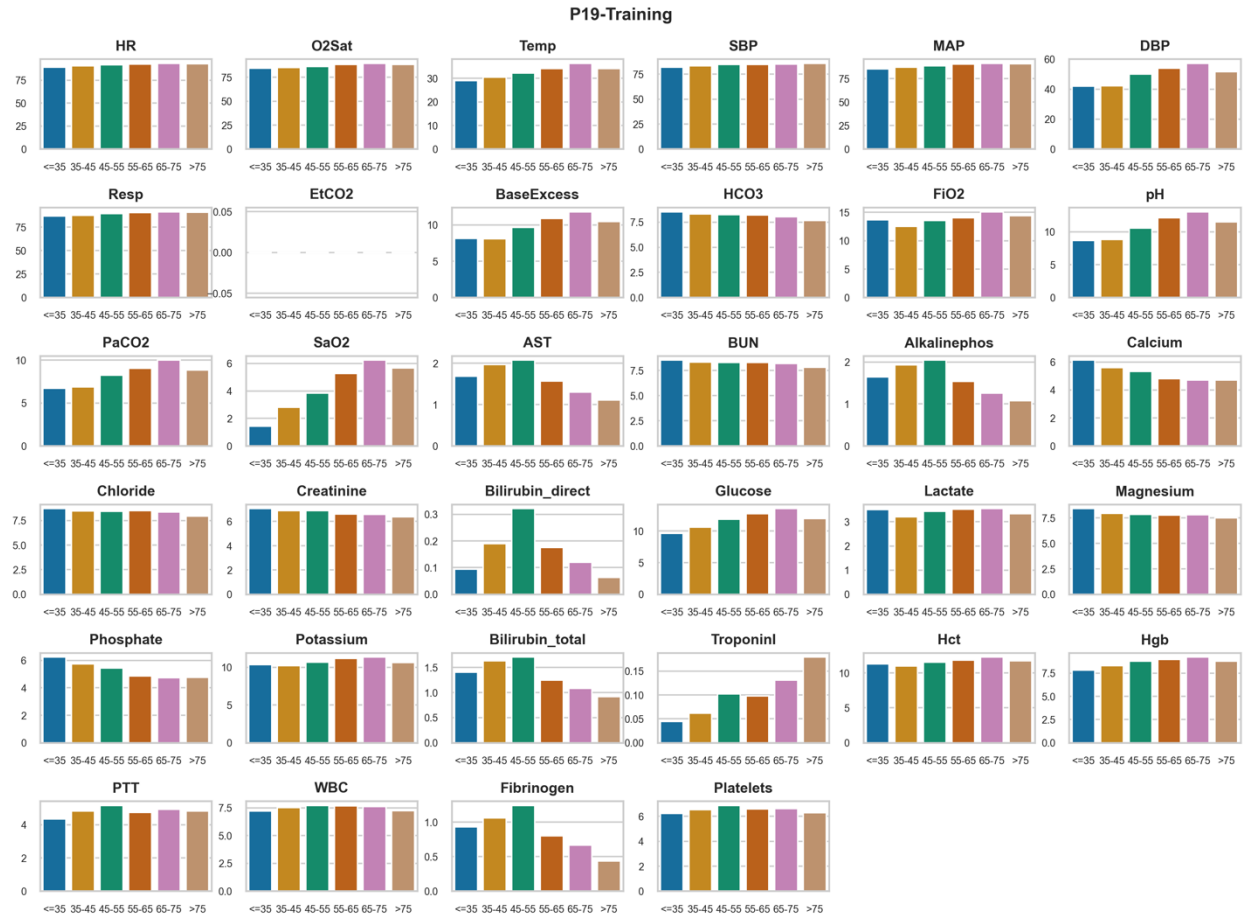

**Figure S8.** Variable observation rates by age group for the **P19** training set (Hospital A).



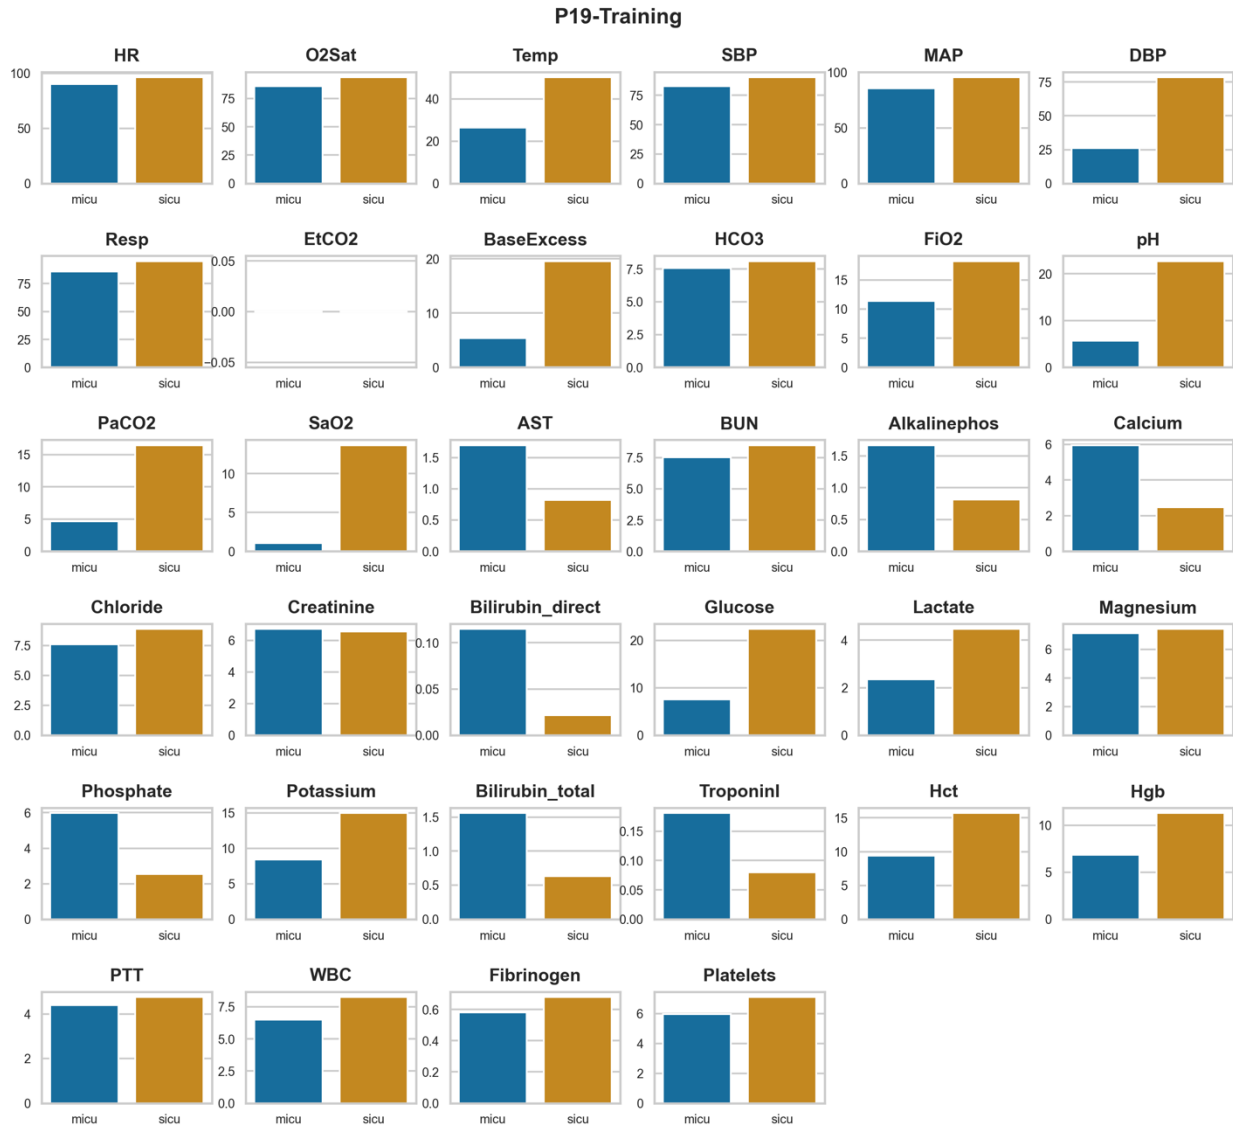

**Figure S9.** Variable observation rates by ICU types for the **P19** training set (Hospital A).

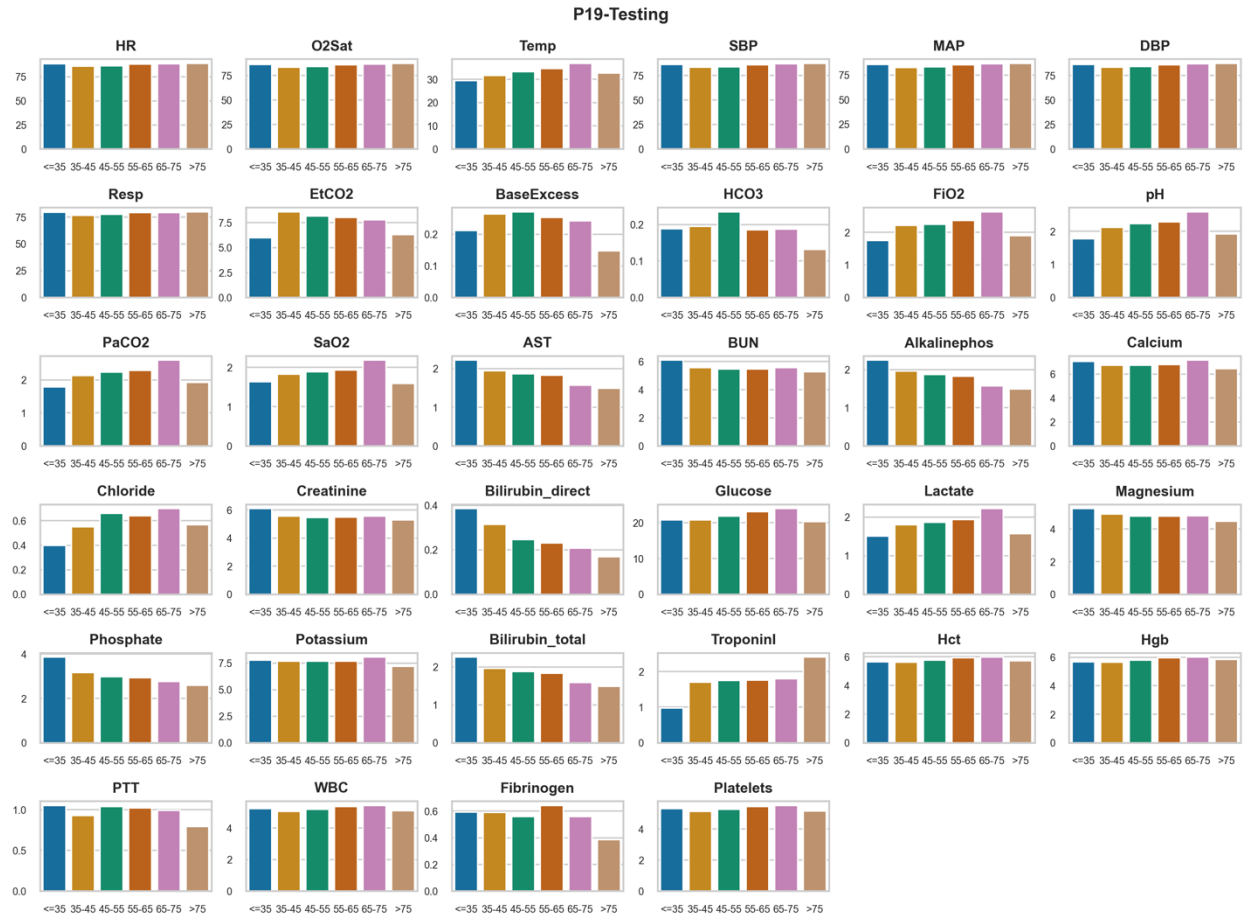

**Figure S10.** Variable observation rates by age group for the **P19** testing set (Hospital B).

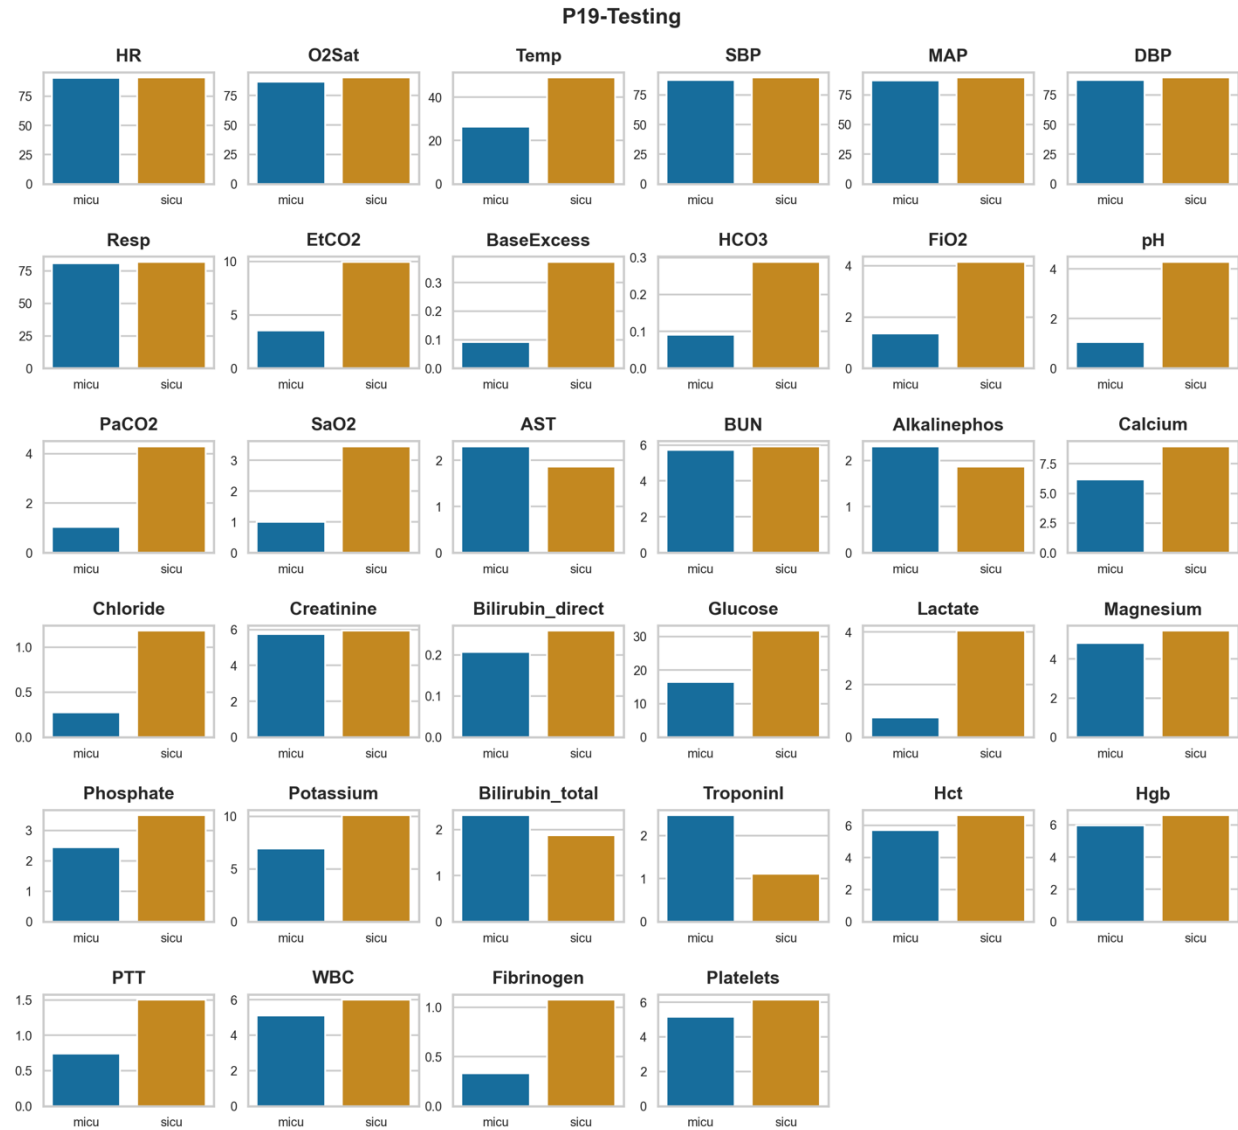

**Figure S11.** Variable observation rates by ICU types for the **P19** testing set (Hospital B).

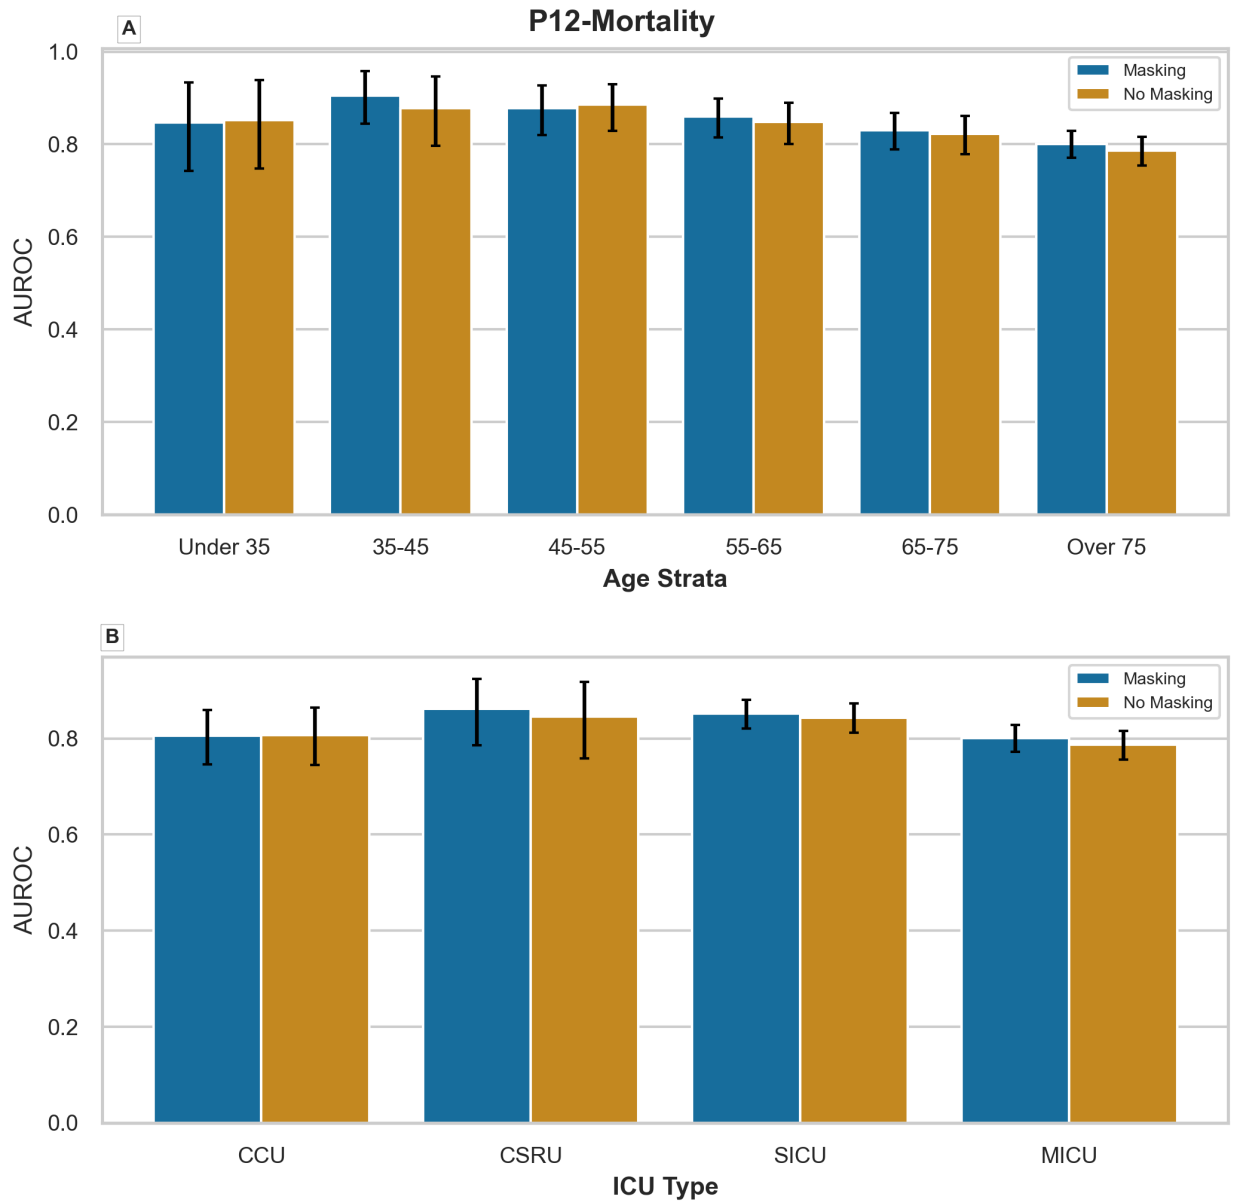

**Figure S12.** Subgroup Analysis results for the **P12** Mortality Classification task. Error bars represent 95% confidence intervals obtained by bootstrapping. Numerical values are available in Table 2 in the main manuscript.

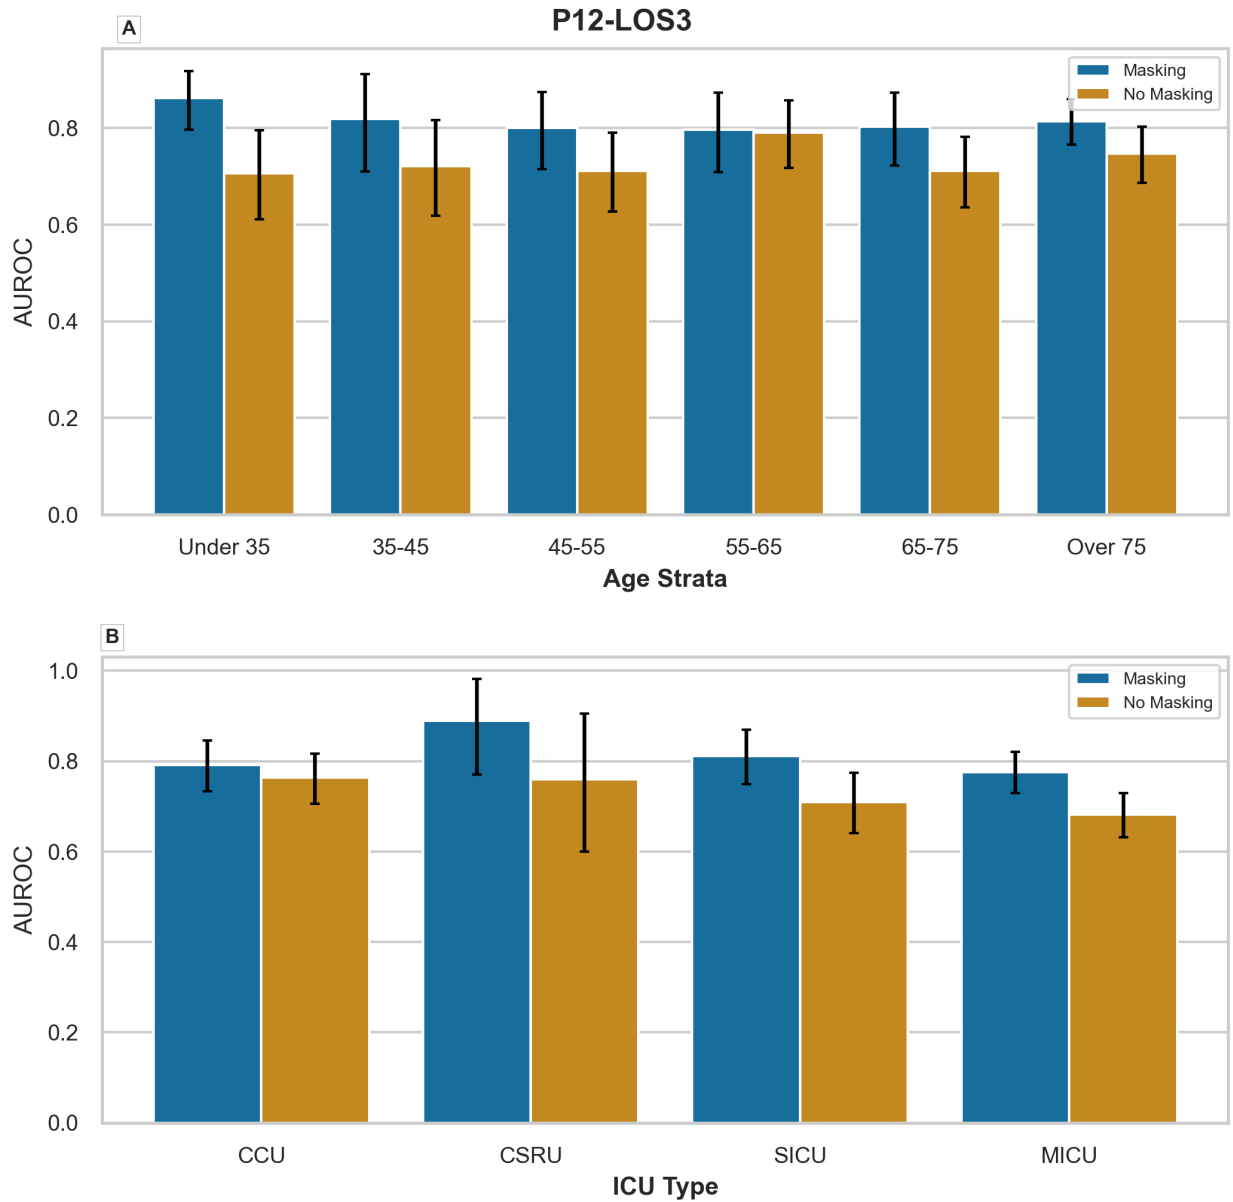

**Figure S13.** Subgroup Analysis results for the **P12** LOS Classification task. Error bars represent 95% confidence intervals obtained by bootstrapping. Numerical values are available in Table 3 in the main manuscript.

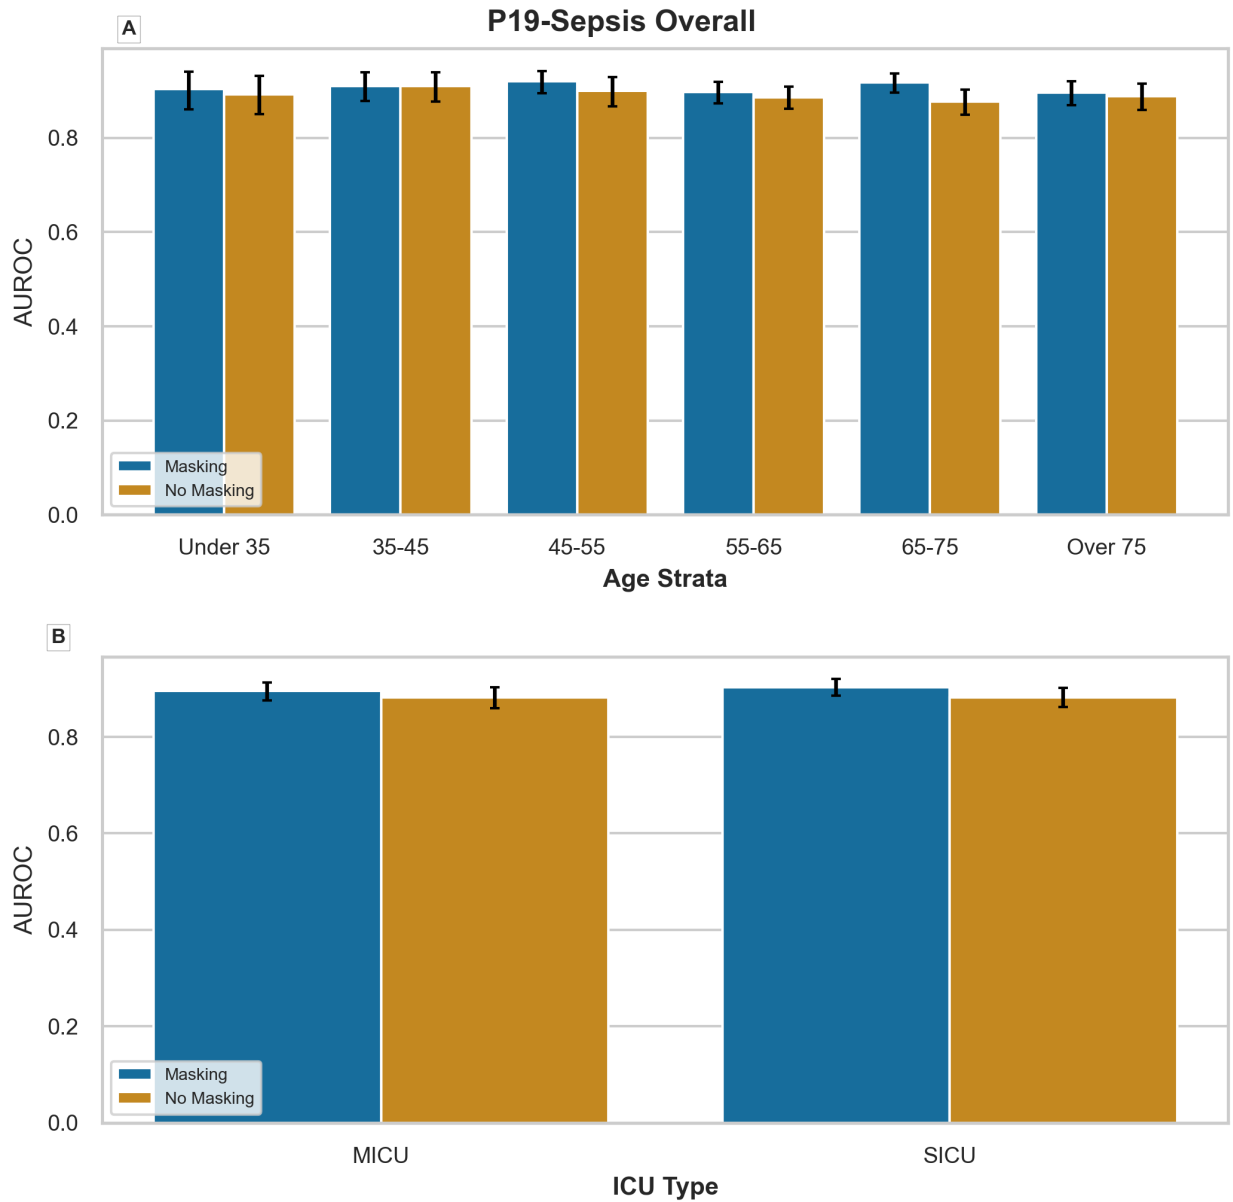

**Figure S14.** Subgroup Analysis results for the **P19** Sepsis-Overall Classification task. Error bars represent 95% confidence intervals obtained by bootstrapping. Numerical values are available in Table 4 in the main manuscript.
